# Supplementary material
Source: PubMed Central journal article supplement (PMC4864996)
Supplement: NIHMS784020-supplement-01.pdf [file NIHMS784020-supplement-01.pdf]

# Supplementary information

## **Engineering Near-Field SEIRA Enhancements in Plasmonic Resonators**

Jungseok Chae<sup>1,2</sup>, Basudev Lahiri<sup>1,2</sup> and Andrea Centrone<sup>1\*</sup>

<sup>1</sup> Center for Nanoscale Science and Technology, National Institute of Standards and Technology  
100 Bureau Drive, Gaithersburg, MD 20899, USA.

<sup>2</sup> Maryland Nanocenter, University of Maryland, College Park, MD 20742 USA.

\*Correspond to: [andrea.centrone@nist.gov](mailto:andrea.centrone@nist.gov)

Page S1: additional PTIR maps and Spectra

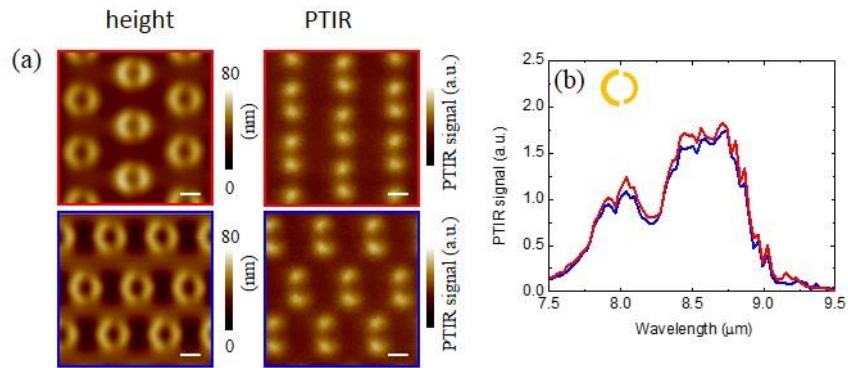

**Figure S1-Sn.** (a) Pairs of height (left column) and PTIR (right column) images obtained at  $1142 \text{ cm}^{-1}$  for vertically shifted and horizontally shifted centered rectangular A-SRR arrays. The PTIR images are displayed with common intensity scale and all scale bars are  $1 \mu\text{m}$ . (b)-(c) Normalized PTIR spectra obtained at the hot spot locations of vertically (red) and horizontally shifted (blue) centered rectangular arrays for A-SRR (b) See the detailed normalization procedure in the experimental.
